# Supplementary material for: Genome-wide mapping of DNase I hypersensitive sites reveals chromatin accessibility changes in Arabidopsis euchromatin and heterochromatin regions under extended darkness
Source: PubMed Central journal article supplement (PMC5481438; doi:10.1038/s41598-017-04524-9), 2017-06-22
Supplement: 41598_2017_4524_MOESM1_ESM.pdf [file 41598_2017_4524_MOESM1_ESM.pdf]

**Genome-wide mapping of DNase I hypersensitive sites reveals chromatin accessibility changes in *Arabidopsis* euchromatin and heterochromatin regions under extended darkness**

Yue Liu<sup>1</sup>, Wenli Zhang<sup>†2</sup>, Kang Zhang<sup>1</sup>, Qi You<sup>1</sup>, Hengyu Yan<sup>1</sup>, Yuannian Jiao<sup>3</sup>, Jiming Jiang<sup>4</sup>, Wenying Xu<sup>1</sup>, Zhen Su<sup>\*1</sup>

<sup>1</sup>College of Biological Sciences, China Agricultural University, State key Laboratory of Plant Physiology and Biochemistry, Beijing, China, <sup>2</sup>Nanjing Agricultural University, State Key Laboratory for Crop Genetics and Germplasm Enhancement, JCIC-MCP, Nanjing, China, <sup>3</sup>State Key Laboratory of Systematic and Evolutionary Botany, Institute of Botany, The Chinese Academy of Sciences, Beijing, China, <sup>4</sup>University of Wisconsin-Madison, Department of Horticulture, Madison, WI, USA

† These authors contributed equally to this work

\* Authors for correspondence

Zhen Su

E-mail: [zhensu@cau.edu.cn](mailto:zhensu@cau.edu.cn)

Work Phone: +86-10-62731380

Fax: +86-10-62731380

## Supplemental figures and tables

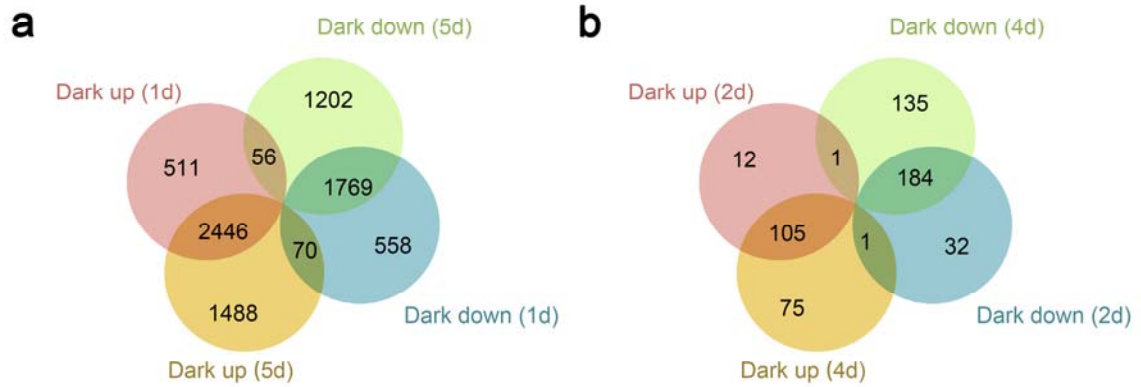

**Supplementary Figure 1 | Venn diagrams of gene expression data between different days of extended dark treatment. (a) The 1-day and 5-day dark treatment measured by ATH1 GeneChip. (b) The 2-day and 4-day dark treatment measured by qRT-PCR.**

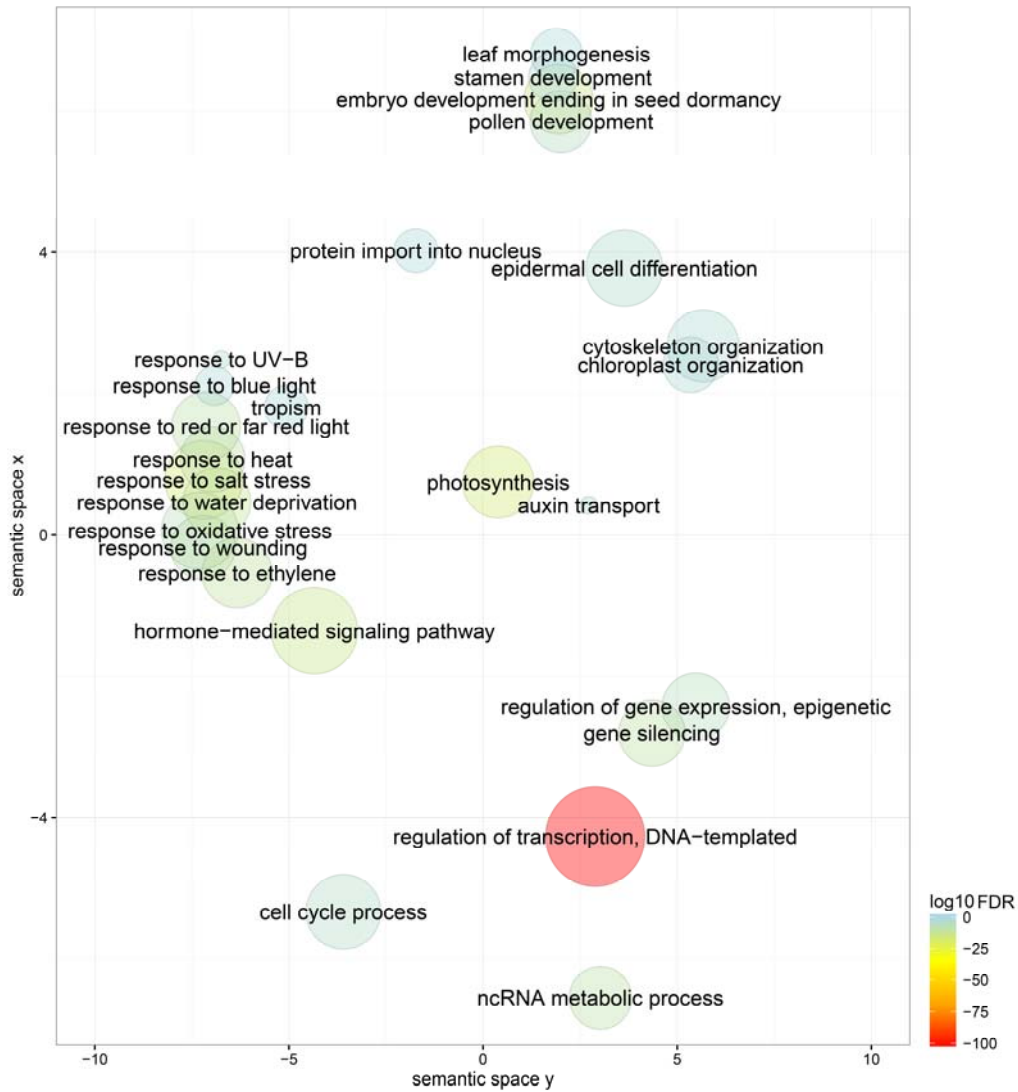

**Supplementary Figure 2 | GO enrichment analysis of DHS-diminished genes under extended darkness by agriGO and REVIGO.** The scatterplot shows the cluster representatives in a two-dimensional space derived by applying multidimensional scaling to a matrix of significant GO terms with semantic similarities. Bubble color and size indicates the  $\log_{10}(\text{FDR P-value})$  (legend in bottom right-hand corner).

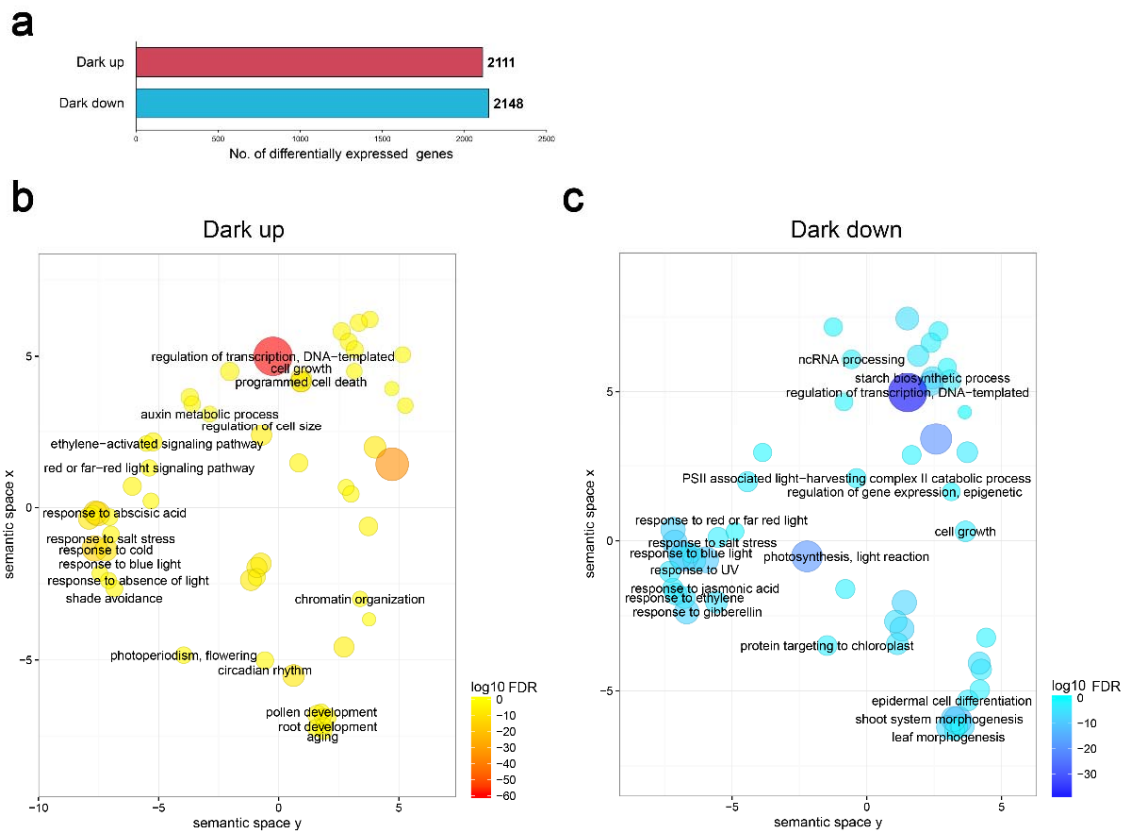

**Supplementary Figure 3 | Differentially expressed genes analysis under extended darkness.** (a) The number of differentially expressed genes under extended darkness. (b, c) GO enrichment analysis of up-regulated (b) and down-regulated (c) genes under extended darkness by agriGO and REVIGO. The scatterplot shows the cluster representatives in a two-dimensional space derived by applying multidimensional scaling to a matrix of significant GO terms with semantic similarities. Bubble color and size indicates the  $\log_{10}(\text{FDR P-value})$  (legend in the bottom right-hand corner).

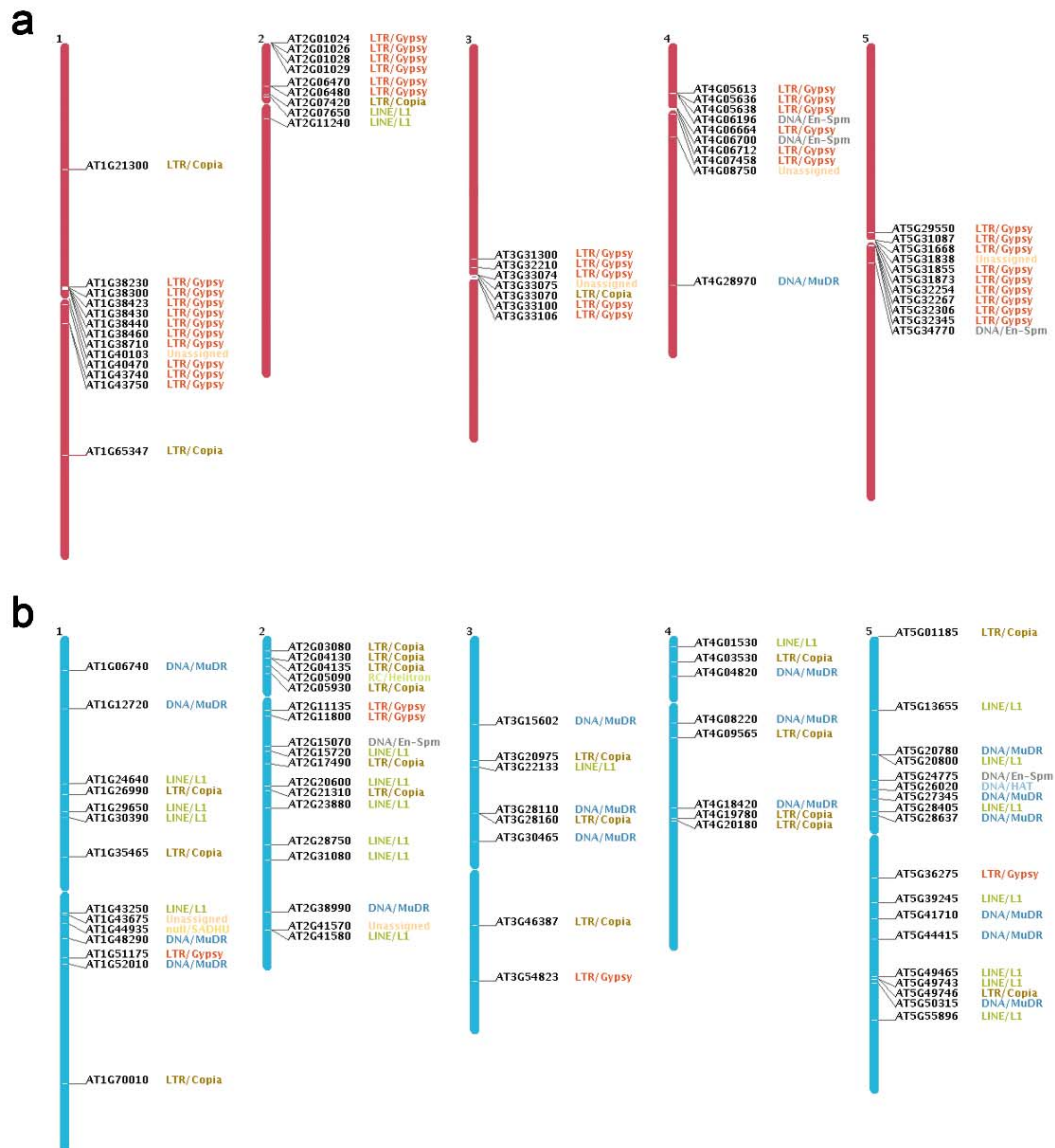

**Supplementary Figure 4 | Locations of DHS-changed TEs on chromosomes. (a) DHS-increased TEs under extended darkness. (b) DHS-diminished TEs under extended darkness.**

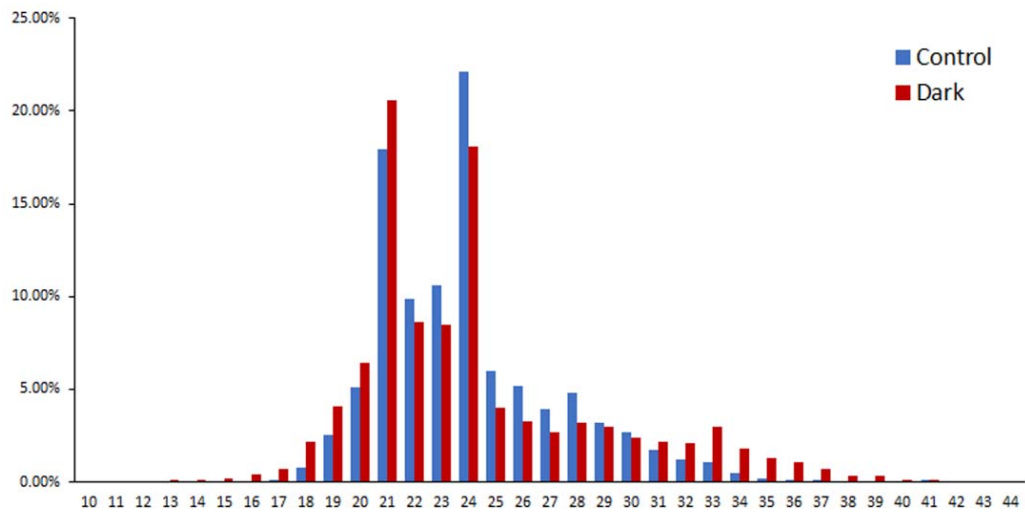

**Supplementary Figure 5 | Length distribution of sequenced small RNAs.**

**Supplementary Table 1 | Statistical summary of DNase I sequencing libraries and identified peak number.**

| <b>Sample</b> | <b>Total reads</b> | <b>Mapped Reads</b> | <b>Mapping rate (%)</b> | <b>Called peaks</b> |
|---------------|--------------------|---------------------|-------------------------|---------------------|
| Dark          | 91,141,444         | 89,146,524          | 97.81                   | 5,948               |
| Control       | 88,954,436         | 82,794,608          | 93.08                   | 10,380              |

**Supplementary Table 2 | Selected enriched GO terms among DHS-diminished genes under extended darkness.**

| GO term    | GO name                                        | Qnum | B/Rnum | FDR       |
|------------|------------------------------------------------|------|--------|-----------|
| GO:0045449 | regulation of transcription                    | 209  | 231    | 1.10E-104 |
| GO:0006412 | translation                                    | 76   | 143    | 2.50E-26  |
| GO:0009651 | response to salt stress                        | 44   | 70     | 3.40E-17  |
| GO:0015979 | photosynthesis                                 | 34   | 39     | 2.90E-16  |
| GO:0044265 | cellular macromolecule catabolic process       | 34   | 42     | 1.40E-15  |
| GO:0009793 | embryonic development ending in seed dormancy  | 40   | 72     | 2.60E-14  |
| GO:0034637 | cellular carbohydrate biosynthetic process     | 28   | 31     | 1.10E-13  |
| GO:0009755 | hormone-mediated signaling pathway             | 35   | 57     | 1.70E-13  |
| GO:0046483 | heterocycle metabolic process                  | 43   | 93     | 2.90E-13  |
| GO:0042742 | defense response to bacterium                  | 25   | 26     | 1.20E-12  |
| GO:0009414 | response to water deprivation                  | 26   | 32     | 5.30E-12  |
| GO:0006457 | protein folding                                | 26   | 36     | 3.10E-11  |
| GO:0048589 | developmental growth                           | 21   | 21     | 6.90E-11  |
| GO:0009723 | response to ethylene stimulus                  | 23   | 30     | 2.50E-10  |
| GO:0006732 | coenzyme metabolic process                     | 21   | 25     | 6.00E-10  |
| GO:0009611 | response to wounding                           | 22   | 30     | 1.30E-09  |
| GO:0016458 | gene silencing                                 | 21   | 27     | 1.60E-09  |
| GO:0009639 | response to red or far red light               | 34   | 83     | 1.80E-09  |
| GO:0051188 | cofactor biosynthetic process                  | 22   | 31     | 1.90E-09  |
| GO:0009408 | response to heat                               | 18   | 18     | 2.40E-09  |
| GO:0034660 | ncRNA metabolic process                        | 22   | 32     | 2.90E-09  |
| GO:0008652 | cellular amino acid biosynthetic process       | 20   | 26     | 4.80E-09  |
| GO:0044264 | cellular polysaccharide metabolic process      | 17   | 19     | 2.20E-08  |
| GO:0032989 | cellular component morphogenesis               | 19   | 28     | 5.70E-08  |
| GO:0010200 | response to chitin                             | 24   | 52     | 1.50E-07  |
| GO:0006979 | response to oxidative stress                   | 31   | 94     | 6.30E-07  |
| GO:0006399 | tRNA metabolic process                         | 13   | 13     | 8.20E-07  |
| GO:0006091 | generation of precursor metabolites and energy | 22   | 49     | 8.90E-07  |
| GO:0048468 | cell development                               | 14   | 17     | 1.20E-06  |
| GO:0040029 | regulation of gene expression, epigenetic      | 20   | 41     | 1.30E-06  |
| GO:0009555 | pollen development                             | 18   | 35     | 3.10E-06  |
| GO:0006633 | fatty acid biosynthetic process                | 12   | 13     | 4.70E-06  |
| GO:0048522 | positive regulation of cellular process        | 16   | 28     | 5.10E-06  |



|            |                                                   |    |     |          |
|------------|---------------------------------------------------|----|-----|----------|
| GO:0043623 | cellular protein complex assembly                 | 14 | 21  | 7.30E-06 |
| GO:0009117 | nucleotide metabolic process                      | 16 | 30  | 1.00E-05 |
| GO:0016049 | cell growth                                       | 17 | 35  | 1.20E-05 |
| GO:0010608 | posttranscriptional regulation of gene expression | 15 | 27  | 1.50E-05 |
| GO:0009699 | phenylpropanoid biosynthetic process              | 16 | 33  | 2.50E-05 |
| GO:0016192 | vesicle-mediated transport                        | 23 | 69  | 2.80E-05 |
| GO:0022402 | cell cycle process                                | 14 | 26  | 4.50E-05 |
| GO:0042545 | cell wall modification                            | 14 | 26  | 4.50E-05 |
| GO:0006790 | sulfur metabolic process                          | 16 | 39  | 0.00014  |
| GO:0048878 | chemical homeostasis                              | 10 | 14  | 0.00021  |
| GO:0007389 | pattern specification process                     | 10 | 15  | 0.00032  |
| GO:0006855 | multidrug transport                               | 8  | 8   | 0.00032  |
| GO:0016052 | carbohydrate catabolic process                    | 12 | 26  | 0.00073  |
| GO:0043603 | cellular amide metabolic process                  | 7  | 7   | 0.0011   |
| GO:0007010 | cytoskeleton organization                         | 13 | 33  | 0.0013   |
| GO:0009165 | nucleotide biosynthetic process                   | 11 | 24  | 0.0016   |
| GO:0009886 | post-embryonic morphogenesis                      | 12 | 29  | 0.0016   |
| GO:0010224 | response to UV-B                                  | 7  | 8   | 0.0018   |
| GO:0048581 | negative regulation of post-embryonic development | 7  | 8   | 0.0018   |
| GO:0030001 | metal ion transport                               | 23 | 98  | 0.0027   |
| GO:0000154 | rRNA modification                                 | 7  | 9   | 0.003    |
| GO:0009913 | epidermal cell differentiation                    | 10 | 22  | 0.0033   |
| GO:0006281 | DNA repair                                        | 17 | 61  | 0.0035   |
| GO:0019362 | pyridine nucleotide metabolic process             | 6  | 6   | 0.0035   |
| GO:0009637 | response to blue light                            | 15 | 49  | 0.0035   |
| GO:0010876 | lipid localization                                | 9  | 18  | 0.0039   |
| GO:0019318 | hexose metabolic process                          | 12 | 34  | 0.0051   |
| GO:0042401 | cellular biogenic amine biosynthetic process      | 6  | 7   | 0.0059   |
| GO:0045454 | cell redox homeostasis                            | 6  | 7   | 0.0059   |
| GO:0048285 | organelle fission                                 | 6  | 8   | 0.0095   |
| GO:0000278 | mitotic cell cycle                                | 5  | 5   | 0.012    |
| GO:0048443 | stamen development                                | 5  | 5   | 0.012    |
| GO:0009808 | lignin metabolic process                          | 6  | 9   | 0.014    |
| GO:0009658 | chloroplast organization                          | 6  | 9   | 0.014    |
| GO:0040034 | regulation of development, heterochronic          | 6  | 9   | 0.014    |
| GO:0048609 | reproductive process in a multicellular organism  | 6  | 9   | 0.014    |
| GO:0045087 | innate immune response                            | 42 | 266 | 0.017    |
| GO:0009225 | nucleotide-sugar metabolic process                | 5  | 6   | 0.019    |
| GO:0009629 | response to gravity                               | 5  | 6   | 0.019    |

|            |                                                                       |   |    |       |
|------------|-----------------------------------------------------------------------|---|----|-------|
| GO:0009965 | leaf morphogenesis                                                    | 7 | 15 | 0.025 |
| GO:0016570 | histone modification                                                  | 5 | 7  | 0.03  |
| GO:0009606 | tropism                                                               | 5 | 7  | 0.03  |
| GO:0034220 | ion transmembrane transport                                           | 5 | 7  | 0.03  |
| GO:0006606 | protein import into nucleus                                           | 5 | 7  | 0.03  |
| GO:0015992 | proton transport                                                      | 5 | 7  | 0.03  |
| GO:0006820 | anion transport                                                       | 5 | 7  | 0.03  |
| GO:0046246 | terpene biosynthetic process                                          | 5 | 8  | 0.043 |
| GO:0009850 | auxin metabolic process                                               | 5 | 8  | 0.043 |
| GO:0009938 | negative regulation of gibberellic acid<br>mediated signaling pathway | 5 | 8  | 0.043 |
| GO:0010014 | meristem initiation                                                   | 5 | 8  | 0.043 |
| GO:0060918 | auxin transport                                                       | 5 | 8  | 0.043 |
| GO:0032879 | regulation of localization                                            | 5 | 8  | 0.043 |

---

**Supplementary Table 3 | Statistical summary of RNA sequencing libraries.**

| <b>Sample</b> | <b>Total reads</b> | <b>Mapped Reads</b> | <b>Mapping rate (%)</b> | <b>Properly paired (%)</b> |
|---------------|--------------------|---------------------|-------------------------|----------------------------|
| Dark rep1     | 75,611,298         | 70,097,103          | 92.70                   | 89.00                      |
| Dark rep2     | 26,292,540         | 25,718,503          | 97.80                   | 96.00                      |
| Dark rep3     | 40,605,160         | 38,806,040          | 95.60                   | 92.60                      |
| Control rep1  | 48,280,292         | 45,077,989          | 93.40                   | 90.30                      |
| Control rep2  | 28,919,402         | 28,228,112          | 97.60                   | 95.80                      |
| Control rep3  | 42,309,538         | 40,862,281          | 96.60                   | 94.40                      |

**Supplementary Table 4 | Selected enriched GO terms among down-regulated genes under extended darkness.**

| <b>GO term</b> | <b>GO name</b>                                | <b>Qnum</b> | <b>B/Rnum</b> | <b>FDR</b> |
|----------------|-----------------------------------------------|-------------|---------------|------------|
| GO:0045449     | regulation of transcription                   | 101         | 231           | 1.50E-40   |
| GO:0006631     | fatty acid metabolic process                  | 35          | 40            | 5.60E-21   |
| GO:0019684     | photosynthesis, light reaction                | 43          | 78            | 3.90E-20   |
| GO:0009611     | response to wounding                          | 26          | 30            | 1.60E-15   |
| GO:0009793     | embryonic development ending in seed dormancy | 34          | 72            | 2.00E-14   |
| GO:0042742     | defense response to bacterium                 | 19          | 26            | 1.60E-10   |
| GO:0010016     | shoot morphogenesis                           | 18          | 27            | 1.70E-09   |
| GO:0009651     | response to salt stress                       | 26          | 70            | 2.80E-09   |
| GO:0009739     | response to gibberellin stimulus              | 15          | 19            | 1.20E-08   |
| GO:0009639     | response to red or far red light              | 27          | 83            | 1.30E-08   |
| GO:0009657     | plastid organization                          | 28          | 91            | 1.80E-08   |
| GO:0009165     | nucleotide biosynthetic process               | 16          | 24            | 1.80E-08   |
| GO:0043623     | cellular protein complex assembly             | 15          | 21            | 2.90E-08   |
| GO:0009642     | response to light intensity                   | 24          | 70            | 4.80E-08   |
| GO:0006720     | isoprenoid metabolic process                  | 18          | 36            | 4.80E-08   |
| GO:0009965     | leaf morphogenesis                            | 13          | 15            | 7.30E-08   |
| GO:0048507     | meristem development                          | 14          | 22            | 2.90E-07   |
| GO:0006779     | porphyrin biosynthetic process                | 18          | 48            | 1.50E-06   |
| GO:0009411     | response to UV                                | 20          | 61            | 1.70E-06   |
| GO:0009414     | response to water deprivation                 | 15          | 32            | 1.80E-06   |
| GO:0048437     | floral organ development                      | 13          | 24            | 3.60E-06   |
| GO:0042254     | ribosome biogenesis                           | 13          | 25            | 5.10E-06   |
| GO:0019252     | starch biosynthetic process                   | 9           | 9             | 8.00E-06   |
| GO:0048468     | cell development                              | 11          | 17            | 8.40E-06   |
| GO:0009624     | response to nematode                          | 18          | 59            | 1.70E-05   |
| GO:0009723     | response to ethylene stimulus                 | 13          | 30            | 2.40E-05   |
| GO:0009743     | response to carbohydrate stimulus             | 18          | 62            | 3.00E-05   |
| GO:0048285     | organelle fission                             | 8           | 8             | 3.40E-05   |
| GO:0009809     | lignin biosynthetic process                   | 8           | 9             | 6.00E-05   |
| GO:0009813     | flavonoid biosynthetic process                | 17          | 61            | 8.50E-05   |
| GO:0048438     | floral whorl development                      | 11          | 24            | 9.50E-05   |
| GO:0042542     | response to hydrogen peroxide                 | 13          | 38            | 1.70E-04   |
| GO:0009913     | epidermal cell differentiation                | 10          | 22            | 2.50E-04   |
| GO:0043455     | regulation of secondary metabolic process     | 7           | 8             | 2.50E-04   |
| GO:0016049     | cell growth                                   | 12          | 35            | 3.50E-04   |
| GO:0040034     | regulation of development, heterochronic      | 7           | 9             | 4.00E-04   |
| GO:0010374     | stomatal complex development                  | 6           | 6             | 5.90E-04   |

|            |                                                                            |    |     |          |
|------------|----------------------------------------------------------------------------|----|-----|----------|
| GO:0019253 | reductive pentose-phosphate cycle                                          | 6  | 6   | 5.90E-04 |
| GO:0019362 | pyridine nucleotide metabolic process                                      | 6  | 6   | 5.90E-04 |
| GO:0009753 | response to jasmonic acid stimulus                                         | 26 | 152 | 6.50E-04 |
| GO:0016036 | cellular response to phosphate starvation                                  | 6  | 7   | 9.90E-04 |
| GO:0010205 | photoinhibition                                                            | 6  | 7   | 9.90E-04 |
| GO:0016570 | histone modification                                                       | 6  | 7   | 9.90E-04 |
| GO:0019761 | glucosinolate biosynthetic process                                         | 11 | 34  | 1.10E-03 |
| GO:0009637 | response to blue light                                                     | 13 | 49  | 1.30E-03 |
| GO:0009886 | post-embryonic morphogenesis                                               | 10 | 29  | 1.40E-03 |
| GO:0045036 | protein targeting to chloroplast                                           | 6  | 8   | 1.60E-03 |
| GO:0045165 | cell fate commitment                                                       | 5  | 5   | 2.40E-03 |
| GO:0009082 | branched chain family amino acid biosynthetic process                      | 5  | 5   | 2.40E-03 |
| GO:0010304 | PSII associated light-harvesting complex II catabolic process              | 5  | 6   | 4.20E-03 |
| GO:0006857 | oligopeptide transport                                                     | 14 | 66  | 5.10E-03 |
| GO:0045595 | regulation of cell differentiation                                         | 5  | 7   | 6.60E-03 |
| GO:0042371 | vitamin K biosynthetic process                                             | 5  | 7   | 6.60E-03 |
| GO:0016122 | xanthophyll metabolic process                                              | 6  | 12  | 7.10E-03 |
| GO:0005983 | starch catabolic process                                                   | 6  | 13  | 9.60E-03 |
| GO:0034470 | ncRNA processing                                                           | 8  | 26  | 1.10E-02 |
| GO:0042538 | hyperosmotic salinity response<br>isopentenyl diphosphate                  | 5  | 9   | 1.40E-02 |
| GO:0019288 | biosynthetic process,<br>mevalonate-independent pathway                    | 5  | 9   | 1.40E-02 |
| GO:0006325 | chromatin organization                                                     | 7  | 21  | 1.60E-02 |
| GO:0006268 | DNA unwinding during replication                                           | 5  | 10  | 1.90E-02 |
| GO:0006281 | DNA repair                                                                 | 12 | 61  | 2.00E-02 |
| GO:0009695 | jasmonic acid biosynthetic process                                         | 7  | 24  | 2.80E-02 |
| GO:0006007 | glucose catabolic process                                                  | 12 | 65  | 3.10E-02 |
| GO:0048580 | regulation of post-embryonic development                                   | 8  | 32  | 3.20E-02 |
| GO:0010228 | vegetative to reproductive phase transition of meristem                    | 13 | 75  | 3.40E-02 |
| GO:0009862 | systemic acquired resistance,<br>salicylic acid mediated signaling pathway | 5  | 12  | 3.40E-02 |
| GO:0009620 | response to fungus                                                         | 18 | 124 | 3.40E-02 |
| GO:0006270 | DNA replication initiation                                                 | 5  | 12  | 3.40E-02 |
| GO:0040029 | regulation of gene expression,<br>epigenetic                               | 9  | 41  | 3.70E-02 |

---

**Supplementary Table 5 | Selected enriched GO terms among up-regulated genes under extended darkness.**

| <b>GO term</b> | <b>GO name</b>                                                                      | <b>Qnum</b> | <b>B/Rnum</b> | <b>FDR</b> |
|----------------|-------------------------------------------------------------------------------------|-------------|---------------|------------|
| GO:0045449     | regulation of transcription                                                         | 127         | 231           | 8.00E-61   |
| GO:0019219     | regulation of nucleobase, nucleoside, nucleotide and nucleic acid metabolic process | 128         | 239           | 2.40E-60   |
| GO:0010468     | regulation of gene expression                                                       | 134         | 275           | 1.50E-59   |
| GO:0006464     | protein modification process                                                        | 78          | 144           | 6.90E-37   |
| GO:0009651     | response to salt stress                                                             | 35          | 70            | 1.20E-15   |
| GO:0010200     | response to chitin                                                                  | 28          | 52            | 4.20E-13   |
| GO:0009723     | response to ethylene stimulus                                                       | 21          | 30            | 2.10E-11   |
| GO:0009409     | response to cold                                                                    | 19          | 28            | 3.90E-10   |
| GO:0048580     | regulation of post-embryonic development                                            | 18          | 32            | 1.10E-08   |
| GO:0044265     | cellular macromolecule catabolic process                                            | 20          | 42            | 1.10E-08   |
| GO:0010038     | response to metal ion                                                               | 15          | 21            | 2.70E-08   |
| GO:0016192     | vesicle-mediated transport                                                          | 23          | 69            | 1.20E-07   |
| GO:0006886     | intracellular protein transport                                                     | 19          | 50            | 4.70E-07   |
| GO:0012501     | programmed cell death                                                               | 13          | 20            | 7.00E-07   |
| GO:0008361     | regulation of cell size                                                             | 16          | 35            | 7.80E-07   |
| GO:0016049     | cell growth                                                                         | 16          | 35            | 7.80E-07   |
| GO:0010876     | lipid localization                                                                  | 12          | 18            | 1.80E-06   |
| GO:0032989     | cellular component morphogenesis                                                    | 14          | 28            | 2.20E-06   |
| GO:0009414     | response to water deprivation                                                       | 13          | 32            | 3.80E-05   |
| GO:0009793     | embryonic development ending in seed dormancy                                       | 19          | 72            | 4.10E-05   |
| GO:0006457     | protein folding                                                                     | 13          | 36            | 1.00E-04   |
| GO:0045454     | cell redox homeostasis                                                              | 7           | 7             | 1.50E-04   |
| GO:0048583     | regulation of response to stimulus                                                  | 13          | 40            | 2.50E-04   |
| GO:0010118     | stomatal movement                                                                   | 7           | 8             | 2.50E-04   |
| GO:0007166     | cell surface receptor linked signaling pathway                                      | 9           | 17            | 2.60E-04   |
| GO:0006631     | fatty acid metabolic process                                                        | 12          | 40            | 9.60E-04   |
| GO:0007623     | circadian rhythm                                                                    | 13          | 47            | 9.60E-04   |
| GO:0048523     | negative regulation of cellular process                                             | 13          | 47            | 9.60E-04   |
| GO:0046395     | carboxylic acid catabolic process                                                   | 16          | 73            | 1.50E-03   |
| GO:0030001     | metal ion transport                                                                 | 19          | 98            | 1.50E-03   |
| GO:0046394     | carboxylic acid biosynthetic process                                                | 14          | 58            | 1.60E-03   |
| GO:0006575     | cellular amino acid derivative metabolic process                                    | 15          | 66            | 1.70E-03   |
| GO:0009408     | response to heat                                                                    | 8           | 18            | 1.80E-03   |

|            |                                                                                              |    |     |          |
|------------|----------------------------------------------------------------------------------------------|----|-----|----------|
| GO:0048364 | root development                                                                             | 11 | 37  | 1.90E-03 |
| GO:0008610 | lipid biosynthetic process                                                                   | 18 | 94  | 2.30E-03 |
| GO:0009641 | shade avoidance                                                                              | 5  | 5   | 2.60E-03 |
| GO:0048878 | chemical homeostasis                                                                         | 7  | 14  | 2.70E-03 |
| GO:0042742 | defense response to bacterium                                                                | 9  | 26  | 3.00E-03 |
| GO:0009908 | flower development                                                                           | 16 | 80  | 3.30E-03 |
| GO:0007389 | pattern specification process                                                                | 7  | 15  | 3.60E-03 |
| GO:0007568 | aging                                                                                        | 15 | 73  | 4.00E-03 |
| GO:0033554 | cellular response to stress                                                                  | 17 | 91  | 4.20E-03 |
| GO:0048532 | anatomical structure arrangement                                                             | 5  | 6   | 4.30E-03 |
| GO:0009081 | branched chain family amino acid metabolic process                                           | 5  | 6   | 4.30E-03 |
| GO:0048573 | photoperiodism, flowering                                                                    | 5  | 6   | 4.30E-03 |
| GO:0048522 | positive regulation of cellular process                                                      | 9  | 28  | 4.40E-03 |
| GO:0006914 | autophagy                                                                                    | 8  | 22  | 4.80E-03 |
| GO:0010017 | red or far-red light signaling pathway                                                       | 9  | 29  | 5.40E-03 |
| GO:0009887 | organ morphogenesis                                                                          | 8  | 23  | 6.10E-03 |
| GO:0009646 | response to absence of light                                                                 | 6  | 12  | 7.10E-03 |
| GO:0016138 | glycoside biosynthetic process                                                               | 5  | 8   | 9.50E-03 |
| GO:0009850 | auxin metabolic process                                                                      | 5  | 8   | 9.50E-03 |
| GO:0006855 | multidrug transport                                                                          | 5  | 8   | 9.50E-03 |
| GO:0009914 | hormone transport                                                                            | 5  | 8   | 9.50E-03 |
| GO:0045935 | positive regulation of nucleobase, nucleoside, nucleotide and nucleic acid metabolic process | 5  | 8   | 9.50E-03 |
| GO:0044264 | cellular polysaccharide metabolic process                                                    | 7  | 19  | 9.60E-03 |
| GO:0009637 | response to blue light                                                                       | 11 | 49  | 1.20E-02 |
| GO:0009873 | ethylene mediated signaling pathway                                                          | 12 | 58  | 1.30E-02 |
| GO:0019438 | aromatic compound biosynthetic process                                                       | 11 | 50  | 1.30E-02 |
| GO:0005984 | disaccharide metabolic process                                                               | 5  | 9   | 1.40E-02 |
| GO:0044242 | cellular lipid catabolic process                                                             | 12 | 59  | 1.40E-02 |
| GO:0010604 | positive regulation of macromolecule metabolic process                                       | 5  | 9   | 1.40E-02 |
| GO:0009555 | pollen development                                                                           | 9  | 35  | 1.50E-02 |
| GO:0006325 | chromatin organization                                                                       | 7  | 21  | 1.50E-02 |
| GO:0048468 | cell development                                                                             | 6  | 17  | 2.60E-02 |
| GO:0009737 | response to abscisic acid stimulus                                                           | 32 | 276 | 2.70E-02 |
| GO:0044271 | cellular nitrogen compound biosynthetic process                                              | 13 | 76  | 3.30E-02 |
| GO:0042545 | cell wall modification                                                                       | 7  | 26  | 3.90E-02 |
| GO:0010016 | shoot morphogenesis                                                                          | 7  | 27  | 4.60E-02 |

**Supplementary Table 6 | Selected enriched GO terms among DHS-diminished and down-regulated genes under extended darkness.**

| <b>GO term</b> | <b>GO name</b>                                          | <b>Qnum</b> | <b>B/Rnum</b> | <b>FDR</b> |
|----------------|---------------------------------------------------------|-------------|---------------|------------|
| GO:0015979     | photosynthesis                                          | 25          | 39            | 1.50E-26   |
| GO:0045449     | regulation of transcription                             | 33          | 231           | 3.20E-18   |
| GO:0006952     | defense response                                        | 23          | 82            | 3.40E-18   |
| GO:0010038     | response to metal ion                                   | 11          | 21            | 3.70E-11   |
| GO:0016070     | RNA metabolic process                                   | 24          | 232           | 1.10E-10   |
| GO:0009409     | response to cold                                        | 9           | 28            | 8.70E-08   |
| GO:0009733     | response to auxin stimulus                              | 9           | 29            | 1.10E-07   |
| GO:0006733     | oxidoreduction coenzyme metabolic process               | 6           | 6             | 2.20E-07   |
| GO:0009639     | response to red or far red light                        | 12          | 83            | 5.90E-07   |
| GO:0016138     | glycoside biosynthetic process                          | 6           | 8             | 6.40E-07   |
| GO:0009408     | response to heat                                        | 7           | 18            | 1.30E-06   |
| GO:0012501     | programmed cell death                                   | 7           | 20            | 2.30E-06   |
| GO:0005982     | starch metabolic process                                | 8           | 33            | 3.00E-06   |
| GO:0009767     | photosynthetic electron transport chain                 | 5           | 5             | 3.00E-06   |
| GO:0009637     | response to blue light                                  | 9           | 49            | 4.00E-06   |
| GO:0008652     | cellular amino acid biosynthetic process                | 7           | 26            | 9.00E-06   |
| GO:0009751     | response to salicylic acid stimulus                     | 5           | 7             | 9.00E-06   |
| GO:0055085     | transmembrane transport                                 | 8           | 44            | 1.80E-05   |
| GO:0009611     | response to wounding                                    | 7           | 30            | 1.90E-05   |
| GO:0043623     | cellular protein complex assembly                       | 6           | 21            | 3.80E-05   |
| GO:0009653     | anatomical structure morphogenesis                      | 10          | 90            | 4.80E-05   |
| GO:0006979     | response to oxidative stress                            | 10          | 94            | 6.70E-05   |
| GO:0070887     | cellular response to chemical stimulus                  | 8           | 62            | 0.00015    |
| GO:0046148     | pigment biosynthetic process                            | 9           | 83            | 0.00016    |
| GO:0006259     | DNA metabolic process                                   | 9           | 92            | 0.00032    |
| GO:0006412     | translation                                             | 11          | 143           | 0.00035    |
| GO:0009814     | defense response, incompatible interaction              | 9           | 95            | 0.0004     |
| GO:0048437     | floral organ development                                | 5           | 24            | 0.00077    |
| GO:0030154     | cell differentiation                                    | 6           | 43            | 0.0011     |
| GO:0055086     | nucleobase, nucleoside and nucleotide metabolic process | 6           | 46            | 0.0015     |
| GO:0065009     | regulation of molecular function                        | 5           | 32            | 0.0024     |
| GO:0040007     | growth                                                  | 6           | 51            | 0.0024     |
| GO:0019318     | hexose metabolic process                                | 5           | 34            | 0.0031     |
| GO:0006457     | protein folding                                         | 5           | 36            | 0.0039     |



|            |                                               |   |    |        |
|------------|-----------------------------------------------|---|----|--------|
| GO:0048519 | negative regulation of biological process     | 7 | 84 | 0.0052 |
| GO:0032787 | monocarboxylic acid metabolic process         | 7 | 85 | 0.0055 |
| GO:0009813 | flavonoid biosynthetic process                | 6 | 61 | 0.0056 |
| GO:0050832 | defense response to fungus                    | 7 | 86 | 0.0058 |
| GO:0033554 | cellular response to stress                   | 7 | 91 | 0.0078 |
| GO:0009108 | coenzyme biosynthetic process                 | 6 | 69 | 0.0098 |
| GO:0009250 | glucan biosynthetic process                   | 5 | 49 | 0.013  |
| GO:0048229 | gametophyte development                       | 5 | 52 | 0.016  |
| GO:0010200 | response to chitin                            | 5 | 52 | 0.016  |
| GO:0009110 | vitamin biosynthetic process                  | 5 | 58 | 0.024  |
| GO:0018130 | heterocycle biosynthetic process              | 6 | 86 | 0.026  |
| GO:0009411 | response to UV                                | 5 | 61 | 0.03   |
| GO:0009066 | aspartate family amino acid metabolic process | 5 | 62 | 0.031  |
| GO:0008610 | lipid biosynthetic process                    | 6 | 94 | 0.038  |
| GO:0006857 | oligopeptide transport                        | 5 | 66 | 0.039  |
| GO:0044275 | cellular carbohydrate catabolic process       | 6 | 98 | 0.046  |
| GO:0009642 | response to light intensity                   | 5 | 70 | 0.049  |

---

**Supplementary Table 7 | Selected enriched GO terms among DHS-diminished and up-regulated genes under extended darkness.**

| <b>GO term</b> | <b>GO name</b>                            | <b>Qnum</b> | <b>B/Rnum</b> | <b>FDR</b> |
|----------------|-------------------------------------------|-------------|---------------|------------|
| GO:0045449     | regulation of transcription               | 17          | 231           | 2.30E-12   |
| GO:0010033     | response to organic substance             | 14          | 210           | 3.80E-10   |
| GO:0043687     | post-translational protein modification   | 7           | 36            | 4.20E-08   |
| GO:0009409     | response to cold                          | 5           | 28            | 9.70E-06   |
| GO:0016070     | RNA metabolic process                     | 8           | 232           | 0.00055    |
| GO:0048519     | negative regulation of biological process | 5           | 84            | 0.0011     |
| GO:0006810     | transport                                 | 9           | 540           | 0.028      |

**Supplementary Table 8 | Enriched motifs in DHSs around photosynthesis-related genes in DHS-diminished and down-regulated genes under extended darkness.**

| Accession       | Name              | Sequence                                   | Count | Z-score | P-value  |
|-----------------|-------------------|--------------------------------------------|-------|---------|----------|
| plantCARE000024 | A_box             | TATCCATCCATCC                              | 38    | 4.76    | 1.00E-06 |
| plantCARE000309 | Prolamin_box      | TGACATGTAAAGTTAAT                          | 56    | 4.57    | 2.40E-06 |
| plantCARE000364 | TATA_box          | TATATAAAGG                                 | 81    | 4.36    | 6.60E-06 |
| plantCARE000263 | LAMP_element      | CCTTATCCA                                  | 103   | 4.29    | 8.90E-06 |
| S000105         | RYREPEATGMGY2     | CATGCAT                                    | 103   | 4.29    | 8.90E-06 |
| plantCARE000007 | 4cl_CMA1b         | ATTCCGATAAACT                              | 72    | 3.97    | 3.61E-05 |
| plantCARE000191 | G_box             | GCCACGTGTCACTC                             | 27    | 3.79    | 7.43E-05 |
| S000282         | CE3OSOSEM         | AACGCGTGTC                                 | 18    | 3.77    | 8.30E-05 |
| plantCARE000026 | ABRE              | ACGTACGTGTGCGCG                            | 19    | 3.73    | 9.45E-05 |
| plantCARE000328 | Sbp_CMA1a         | CTCTATCTTCTCCGG                            | 19    | 3.59    | 1.67E-04 |
| S000144         | EBOXBNNAPA        | CANNTG                                     | 255   | 3.42    | 3.17E-04 |
| S000118         | ABRE3HVA22        | GCCACGTACA                                 | 52    | 3.32    | 4.46E-04 |
| plantCARE000368 | TATA_box          | TATATGT                                    | 61    | 3.27    | 5.33E-04 |
| S000292         | DPBFCOREDCCDC3    | ACACNNG                                    | 84    | 3.17    | 7.59E-04 |
| plantCARE000260 | JERE              | AGACCGCC                                   | 84    | 3.17    | 7.59E-04 |
| plantCARE000139 | Chs_unit_1_m2     | TCCGGTGGCCGTCCCTC                          | 14    | 3.16    | 7.84E-04 |
| S000302         | LREBOXIPCCHS1     | AACCTAACCT                                 | 73    | 3.13    | 8.74E-04 |
| S000156         | SARECAMV          | CTGACGTAAGGGATGACGCAC                      | 73    | 3.13    | 8.74E-04 |
| plantCARE000059 | ATC_motif         | AGTAATCT                                   | 18    | 3.08    | 1.02E-03 |
| S000204         | BOX2PSGS2         | TCTAAGCAAAG                                | 13    | 2.98    | 1.42E-03 |
| plantCARE000314 | Prolamin_box      | TGCCATGTAAAGATGAC                          | 7     | 2.98    | 1.45E-03 |
| plantCARE000060 | ATC_motif         | GCCAATCC                                   | 7     | 2.98    | 1.45E-03 |
| S000127         | RBCSCONSENSUS     | AATCCAA                                    | 43    | 2.96    | 1.53E-03 |
| S000142         | ELRECOREPCR1      | TTGACC                                     | 23    | 2.87    | 2.05E-03 |
| plantCARE000157 | Footprint_A       | AGTACATCTCATCCATTT                         | 9     | 2.79    | 2.68E-03 |
| S000131         | ACGTCBOX          | GACGTC                                     | 22    | 2.63    | 4.26E-03 |
| plantCARE000111 | CCAAT_box         | CAACGG                                     | 30    | 2.60    | 4.71E-03 |
| plantCARE000049 | AE_box            | AGAAACWT                                   | 181   | 2.59    | 4.77E-03 |
| plantCARE000369 | TATA_box          | TATATTTATATTT                              | 5     | 2.58    | 4.90E-03 |
| S000180         | MYBST1            | GGATA                                      | 306   | 2.56    | 5.18E-03 |
| S000014         | ABRECE1HVA22      | TGCCACCGG                                  | 306   | 2.56    | 5.18E-03 |
| S000317         | ATHB1ATCONSENSUS  | CAATWATTG                                  | 5     | 2.56    | 5.25E-03 |
| plantCARE000237 | HSE               | GAAGAAAATGTTTTAAAACT                       | 14    | 2.56    | 5.28E-03 |
| plantCARE000399 | Unnamed_1         | TCTTACACGTGGCACCTC                         | 5     | 2.50    | 6.23E-03 |
| S000267         | OCETYPEINTHISTONE | CCACGTCANCGATCCGCG                         | 972   | 2.45    | 7.08E-03 |
| S000494         | EECCRCAH1         | GANTTNC                                    | 154   | 2.40    | 8.10E-03 |
| S000174         | MYCATRD22         | CACATG                                     | 18    | 2.39    | 8.46E-03 |
| plantCARE000388 | TGGCA             | GACACCAAGTGGA                              | 38    | 2.35    | 9.40E-03 |
| plantCARE000235 | HSE               | CTAGAACTGTAGAGAAATCTCCAGAACTTACCAGAAGCTACA | 43    | 2.33    | 1.00E-02 |
| S000183         | SP8BFIBSP8AIB     | ACTGTGTA                                   | 17    | 2.32    | 1.02E-02 |

|                          |                          |                      |           |             |                 |
|--------------------------|--------------------------|----------------------|-----------|-------------|-----------------|
| plantCARE000013          | 4cl_CMA2b                | TCTCACCAACCMCA       | 17        | 2.32        | 1.03E-02        |
| S000219                  | ABREBZMRAB28             | TCCACGTCTC           | 28        | 2.28        | 1.13E-02        |
| S000085                  | INTRONUPPER              | MAGGTAAGT            | 8         | 2.27        | 1.15E-02        |
| plantCARE000032          | ACA_motif                | AATCACAACCATA        | 36        | 2.27        | 1.16E-02        |
| S000116                  | OCTAMOTIF2               | CGCGGCAT             | 94        | 2.25        | 1.21E-02        |
| <b>GLK binding motif</b> | <b>GLK binding motif</b> | <b>CCAATC</b>        | <b>59</b> | <b>2.22</b> | <b>1.33E-02</b> |
| S000348                  | CARG2ATAP3               | CTTACCTTTCATGGATTA   | 5         | 2.21        | 1.37E-02        |
| S000356                  | MREATCHS                 | TCTAACCTACCA         | 5         | 2.14        | 1.63E-02        |
| plantCARE000286          | MSA_like                 | TGCAACGGC            | 58        | 2.13        | 1.66E-02        |
| S000330                  | D3GMAUX28                | TATTTGCTTAA          | 47        | 2.09        | 1.83E-02        |
| plantCARE000193          | G_box                    | GCCTTGTGTAG          | 3         | 2.07        | 1.90E-02        |
| S000324                  | GBOXPC                   | ACCACGTGGC           | 3         | 2.07        | 1.90E-02        |
| S000264                  | RYREPEATBNNAPA           | CATGCA               | 9         | 2.07        | 1.93E-02        |
| plantCARE000422          | Unnamed_6                | TATAAATATCT          | 26        | 2.07        | 1.94E-02        |
| plantCARE000174          | GATT_motif               | CTCTGATTGGA          | 11        | 2.05        | 2.03E-02        |
| plantCARE000420          | Unnamed_6                | ATCCACCTTTCGTGTACC   | 45        | 2.04        | 2.09E-02        |
| plantCARE000383          | TC_rich_repeats          | ATTCTCTAAC           | 238       | 1.97        | 2.43E-02        |
| plantCARE000054          | As_2_box                 | GATAATGATG           | 28        | 1.95        | 2.55E-02        |
| S000088                  | POLASIG3                 | AATAAT               | 308       | 1.89        | 2.91E-02        |
| plantCARE000117          | CGT_motif                | CCTGAACGC            | 308       | 1.89        | 2.91E-02        |
| S000019                  | ACGTSEED3                | GTACGTGGCG           | 67        | 1.88        | 3.00E-02        |
| S000159                  | TCA1MOTIF                | TCATCTTCTT           | 3         | 1.88        | 3.01E-02        |
| S000430                  | GCCCORE                  | GCCGCC               | 10        | 1.88        | 3.03E-02        |
| S000250                  | LTRE1HVBLT49             | CCGAAA               | 140       | 1.85        | 3.18E-02        |
| S000048                  | GLUTEBP1OS               | AAGCAACACACAAC       | 51        | 1.83        | 3.38E-02        |
| S000307                  | ELRE2PCPAL1              | ATTCTCACCTACCA       | 141       | 1.82        | 3.41E-02        |
| plantCARE000316          | Prolamin_box             | TGTAGTGAAAGTGAAA     | 464       | 1.81        | 3.49E-02        |
| plantCARE000253          | L_box                    | GATAKGG              | 50        | 1.81        | 3.51E-02        |
| S000483                  | SORLIP2AT                | GGGCC                | 4         | 1.80        | 3.62E-02        |
| plantCARE000100          | CAAT_box                 | CTCCAATAG            | 49        | 1.78        | 3.74E-02        |
| plantCARE000267          | L_box                    | CTACCTACCCTCTAATATC  | 2         | 1.75        | 3.99E-02        |
| S000507                  | ABRERATCAL               | MACGYGB              | 2         | 1.73        | 4.14E-02        |
| S000393                  | ARECOREZMGAPC4           | AGCAACGGTC           | 8         | 1.72        | 4.28E-02        |
| S000242                  | NRRBNEXTA                | TAGTGGAT             | 2         | 1.69        | 4.52E-02        |
| S000133                  | ABREZMRAB28              | CCACGTGG             | 2         | 1.69        | 4.52E-02        |
| S000203                  | TATABOX5                 | TTATTT               | 2         | 1.67        | 4.70E-02        |
| plantCARE000161          | GAG_motif                | RGAGATG              | 2         | 1.67        | 4.75E-02        |
| plantCARE000092          | Box_W2                   | TTCAGCCATCAAAGTTGACC | 2         | 1.65        | 4.90E-02        |

**Supplementary Table 9 | Changes in genes involved in the retrograde pathway and interacting components under extended darkness in terms of expression and DHS.**

| <b>Retrograde Pathway / Interacting Components</b> | <b>Gene Symbol</b> | <b>Locus ID</b> | <b>RNA-seq</b> | <b>DHS-changed significantly</b> | <b>DHS peak only in one condition</b> |
|----------------------------------------------------|--------------------|-----------------|----------------|----------------------------------|---------------------------------------|
| Tetrapyrroles                                      | GUN1               | AT2G31400       |                |                                  |                                       |
|                                                    | GUN2               | AT2G26670       |                |                                  |                                       |
|                                                    | GUN3               | AT3G09150       |                |                                  |                                       |
|                                                    | GUN4               | AT3G59400       | down-regulated | DHS-diminished                   | Only in Control                       |
|                                                    | GUN5               | AT5G13630       | down-regulated | DHS-diminished                   | Only in Control                       |
|                                                    | /CHLH              |                 |                |                                  |                                       |
|                                                    | GUN6 /FC1          | AT5G26030       |                | DHS-diminished                   | Only in Control                       |
|                                                    | HSP90.1 /          | AT5G52640       | down-regulated |                                  |                                       |
|                                                    | HSP81-1            |                 |                |                                  |                                       |
|                                                    | HSP81-2            | AT5G56030       | down-regulated |                                  | Only in Control                       |
|                                                    | HSP90.3 /          | AT5G56010       | down-regulated |                                  |                                       |
|                                                    | HSP81-3            |                 |                |                                  |                                       |
|                                                    | HSP90.5 /          | AT2G04030       | down-regulated |                                  | Only in Control                       |
|                                                    | CR88               |                 |                |                                  |                                       |
|                                                    | HY5                | AT5G11260       |                |                                  | Only in Control                       |
| CRY1                                               | AT4G08920          |                 |                | Only in Control                  |                                       |
| PAPP5                                              | AT2G42810          |                 |                |                                  |                                       |
| ABI4                                               | AT2G40220          |                 |                |                                  |                                       |
| PTM                                                | AT5G35210          |                 |                | Only in Control                  |                                       |
| LHCb1.2                                            | AT1G29910          |                 |                | DHS-diminished                   | Only in Control                       |
| Plastid Transcription and Translation              | SIG2               | AT1G08540       | down-regulated |                                  | Only in Control                       |
|                                                    | SIG6               | AT2G36990       | down-regulated |                                  | Only in Control                       |
|                                                    | PRIN2              | AT1G10522       |                |                                  |                                       |
|                                                    | GLK1               | AT2G20570       | down-regulated |                                  |                                       |
|                                                    | GLK2               | AT5G44190       |                |                                  |                                       |
|                                                    | SG1                | AT3G18420       |                |                                  | Only in Control                       |
| Singlet oxygen ( <sup>1</sup> O <sub>2</sub> )     | CH1 / CAO          | AT1G44446       | down-regulated | DHS-diminished                   | Only in Control                       |
|                                                    | FLU                | AT3G14110       |                |                                  |                                       |
|                                                    | EX1                | AT4G33630       |                | DHS-diminished                   | Only in Control                       |
|                                                    | EX2                | AT1G27510       |                |                                  |                                       |
|                                                    | MBS                | AV621044B       |                |                                  |                                       |
|                                                    | MBS1               | AT3G02790       |                |                                  | Only in Control                       |
|                                                    | MBS2               | AT5G16470       |                |                                  |                                       |
|                                                    | AAA-ATPase         | AT3G28580       |                | DHS-diminished                   | Only in Control                       |
| Photosynthetic Redox State                         | STN7               | AT1G68830       | down-regulated |                                  |                                       |
|                                                    | PRORS1-1           | AT5G52520       | down-regulated | DHS-diminished                   | Only in Control                       |
|                                                    | STZ / ZAT10        | AT1G27730       |                |                                  |                                       |
|                                                    | Rap2.4a            | AT1G22190       | up-regulated   |                                  | Only in Control                       |
|                                                    | HSFA1D             | AT1G32330       |                |                                  |                                       |

|          |             |           |                |                |                 |
|----------|-------------|-----------|----------------|----------------|-----------------|
|          | HSFA2       | AT2G26150 | down-regulated | DHS-diminished | Only in Control |
|          | HSFA3       | AT5G03720 | up-regulated   |                |                 |
|          | CDKE1       | AT5G63610 |                |                |                 |
| SAL1-PAP | SAL1        | AT5G63980 |                |                |                 |
|          | XRN2        | AT5G42540 |                |                | Only in Control |
|          | XRN3        | AT1G75660 |                |                |                 |
|          | XRN4 / EIN5 | AT1G54490 |                |                |                 |
|          | APX2        | AT3G09640 |                |                |                 |

**Supplementary Table 10 | Changes in genes associated with RdDM under extended darkness and control condition.**

| Gene Name                 | Locus ID  | DNase-seq |      |                 | RNA-seq          |               |                        |         |                       |
|---------------------------|-----------|-----------|------|-----------------|------------------|---------------|------------------------|---------|-----------------------|
|                           |           | Control   | Dark | Changes         | Control-<br>FPKM | Dark-<br>FPKM | log2(Control/<br>Dark) | P-value | Changes               |
| AGO1                      | AT1G48410 | yes       | no   |                 | 54.20            | 47.88         | 0.18                   | 0.80    |                       |
| AGO4                      | AT2G27040 | yes       | no   |                 | 15.71            | 6.89          | 1.19                   | 0.05    |                       |
| AGO6                      | AT2G32940 | yes       | yes  |                 | 0.72             | 0.32          | 1.18                   | 0.09    |                       |
| AGO9                      | AT5G21150 | yes       | no   |                 | 0.10             | 0.14          | -0.47                  | 1.00    |                       |
| CLSY1                     | AT3G42670 | yes       | no   |                 | 1.03             | 0.92          | 0.16                   | 0.81    |                       |
| CMT2                      | AT4G19020 | yes       | yes  |                 | 4.93             | 2.52          | 0.97                   | 0.09    |                       |
| CMT3                      | AT1G69770 | no        | no   |                 | 5.20             | 1.99          | 1.39                   | 0.04    |                       |
| DCL4                      | AT5G20320 | yes       | no   |                 | 2.55             | 2.40          | 0.09                   | 0.88    |                       |
| DDM1                      | AT5G66750 | no        | no   |                 | 2.72             | 1.29          | 1.07                   | 0.06    |                       |
| DMS3                      | AT3G49250 | yes       | no   |                 | 4.18             | 1.91          | 1.13                   | 0.05    |                       |
| DMS4                      | AT2G30280 | yes       | no   |                 | 5.32             | 6.37          | -0.26                  | 0.63    |                       |
| DRD1                      | AT2G16390 | yes       | no   |                 | 1.62             | 1.56          | 0.06                   | 0.93    |                       |
| HEN1                      | AT4G20910 | yes       | yes  |                 | 2.62             | 1.26          | 1.06                   | 0.08    |                       |
| IDP1                      | AT1G15910 | yes       | no   |                 | 5.76             | 9.28          | -0.69                  | 0.22    |                       |
| KTF1                      | AT5G04290 | yes       | no   |                 | 6.48             | 9.31          | -0.52                  | 0.38    |                       |
| LDL2                      | AT3G13682 | yes       | no   |                 | 0.86             | 0.94          | -0.14                  | 0.84    |                       |
| MET1                      | AT5G49160 | yes       | no   |                 | 5.33             | 2.60          | 1.03                   | 0.04    |                       |
| MORC1                     | AT4G36290 | yes       | no   |                 | 3.92             | 3.65          | 0.10                   | 0.86    |                       |
| MORC6                     | AT1G19100 | yes       | no   |                 | 4.03             | 3.54          | 0.18                   | 0.73    |                       |
| NRPD1(Pol IV)             | AT1G63020 | yes       | yes  |                 | 0.94             | 0.73          | 0.37                   | 0.56    |                       |
| NRPD2/NRPE2(Pol IV/Pol V) | AT3G23780 | yes       | no   |                 | 5.83             | 4.03          | 0.53                   | 0.32    |                       |
| NRPE9B(Pol V)             | AT4G16265 | yes       | no   |                 | 9.79             | 7.94          | 0.30                   | 0.63    |                       |
| RDM1                      | AT3G22680 | yes       | no   |                 | 30.93            | 27.64         | 0.16                   | 0.75    |                       |
| RDR6                      | AT3G49500 | yes       | no   |                 | 4.79             | 3.62          | 0.41                   | 0.45    |                       |
| SHH1                      | AT1G15215 | yes       | no   |                 | 3.79             | 4.16          | -0.14                  | 0.90    |                       |
| SUVH5                     | AT2G35160 | yes       | no   |                 | 0.44             | 0.39          | 0.18                   | 1.00    |                       |
| SUVH6                     | AT2G22740 | yes       | no   |                 | 4.99             | 4.43          | 0.17                   | 0.77    |                       |
| SUVH9                     | AT4G13460 | yes       | no   |                 | 15.83            | 13.23         | 0.26                   | 0.64    |                       |
| VIM1                      | AT1G57820 | no        | no   |                 | 7.45             | 2.77          | 1.43                   | 0.01    |                       |
|                           |           |           |      | Significant     |                  |               |                        |         | log2FC>1&Pvalue<0.05  |
|                           |           |           |      | Only in Control |                  |               |                        |         | log2FC>0.8&Pvalue<0.1 |

**Supplementary Table 11 | Statistical summary of small RNA sequencing libraries and sequenced read annotation.**

|             | <b>Dark</b> | <b>Control</b> |
|-------------|-------------|----------------|
| total reads | 18829885    | 23336567       |
| genome      | 3820103     | 4087642        |
| exon_sense  | 73966       | 143556         |
| miRNA       | 3165638     | 3182298        |
| rRNA        | 9163365     | 12079985       |
| repeat      | 3453        | 5222           |
| snRNA       | 34643       | 29660          |
| snoRNA      | 23294       | 11250          |
| tRNA        | 1274481     | 1014403        |
| unann       | 5091045     | 6870193        |



**Supplementary Table 12 | Differential TE families in terms of siRNAs under extended darkness treatment and control condition.**

|             | <b>Genome</b> | <b>siRNA-increased TEs</b> | <b>siRNA-decreased TEs</b> |
|-------------|---------------|----------------------------|----------------------------|
| DNA/En-Spm  | 356           | 3                          | 5                          |
| DNA/HAT     | 84            | 0                          | 4                          |
| DNA/MuDR    | 725           | 14                         | 23                         |
| LINE/L1     | 398           | 6                          | 12                         |
| LTR/Copia   | 514           | 9                          | 26*                        |
| LTR/Gypsy   | 1277          | 134*                       | 55*                        |
| null/SADHU  | 17            | 2                          | 0                          |
| RC/Helitron | 166           | 0                          | 2                          |
| Unassigned  | 326           | 15                         | 4                          |

\* Indicates a significant difference. Significance was calculated by hypergeometric distribution with a cut-off of 0.05.

**Supplementary Data 1 | DHS-changed genes and closest peaks of differential DHSs after dark treatment (non-TE).**

(in additional excel file)

**Supplementary Data 2 | DHS-changed genes and closest peaks of differential DHSs after dark treatment (TE).**

(in additional excel file)

**Supplementary Data 3 | Comparison of DHS-changed genes between DH\_WT\_dark treatment\_vs\_control and DH\_WT\_dark treatment\_vs\_GSM847326-28.**

(in additional excel file)

**Supplementary Data 4 | Differentially expressed genes under extended darkness treatment and control condition.**

(in additional excel file)

**Supplementary Data 5 | Q-RT-PCR validation of the RNA-seq data.**

(in additional excel file)

**Supplementary Data 6 | The closest peaks and expression levels of 519 DHS-diminished and down-regulated genes under extended darkness.**

(in additional excel file)

**Supplementary Data 7 | The closest peaks and expression levels of 180 DHS-diminished and up-regulated genes under extended darkness.**

(in additional excel file)

**Supplementary Data 8 | Comparison of selected enriched GO terms among DHS-diminished and up-regulated genes under extended darkness, all DHS-diminished genes, and all down-regulated genes.**

(in additional excel file)

**Supplementary Data 9 | DHS-diminished and down-regulated genes involved in photosynthesis.**

(in additional excel file)

**Supplementary Data 10 | Gene list of siRNA-changed TEs under extended darkness and control condition.**

(in additional excel file)
